# Supplementary material
Source: publisher figshare collection journal article supplement (https://frontiersin.figshare.com/ndownloader/files/16846877)
Supplement: Supplementary file [file 16846877]

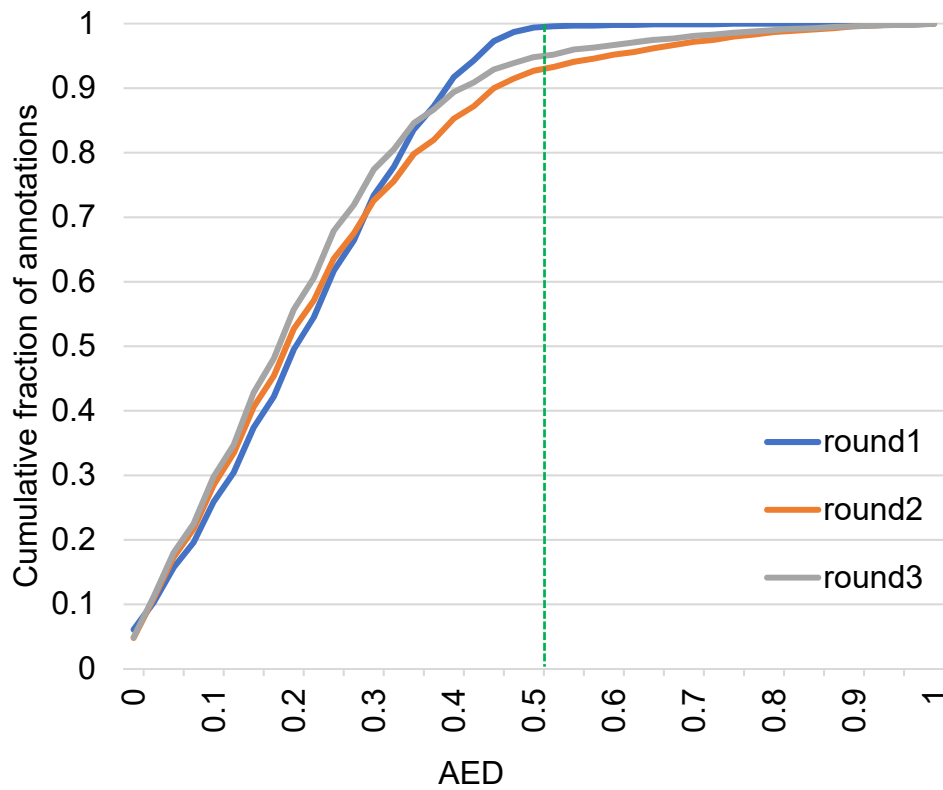

**Supplementary Figure 2. Cumulative fraction plot of the annotation edit distance (AED) of gene models after each round of MAKER.** An AED of zero indicates perfect congruence between the model and associated evidence (i.e. transcript and/or protein alignments). The dashed green line illustrates that all rounds resulted in > 90% of gene models with AED < 0.5.
